# Supplementary material
Source: PubMed Central journal article supplement (PMC3377100)
Supplement: emmm0003-0581-SD2.pdf [file emmm0003-0581-SD2.pdf]

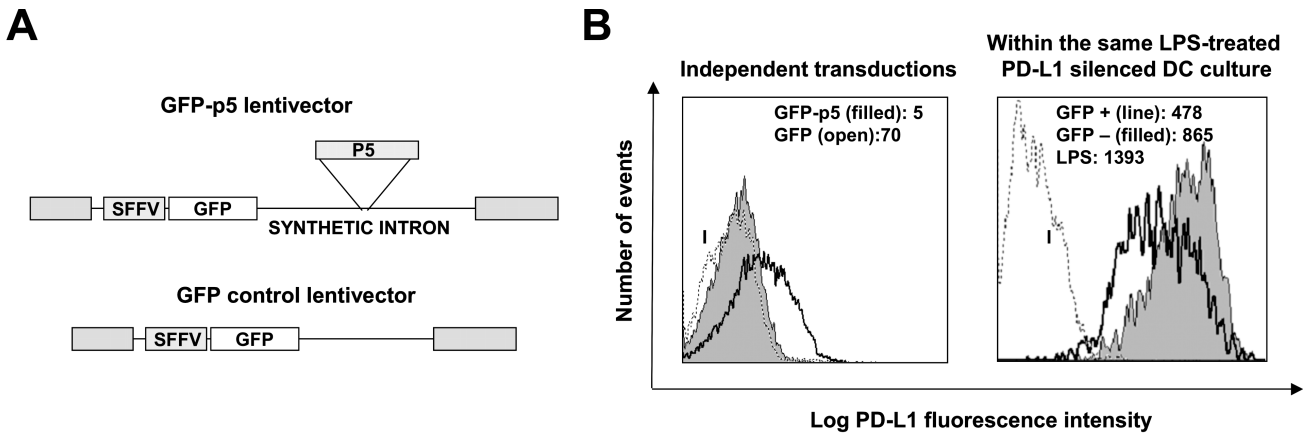

**Supplementary Figure 1. PD-L1 silencing in DCs.** A. Lentivector delivering GFP and shRNA-p5 (upper scheme) and control lentivector (lower scheme). B. PD-L1 surface expression in DCs transduced with the indicated lentivectors within the histograms. On the right, the same data with DCs from a single co-cultured, transduced with a lentivector co-delivering IiOVA-GFP, and treated with LPS to induce PD-L1 up-regulation. DCs were gated either in GFP+ (transduced) or GFP- (untransduced) DCs as indicated within the histogram. LPS-treated DCs are not represented in this histogram for simplification purposes.

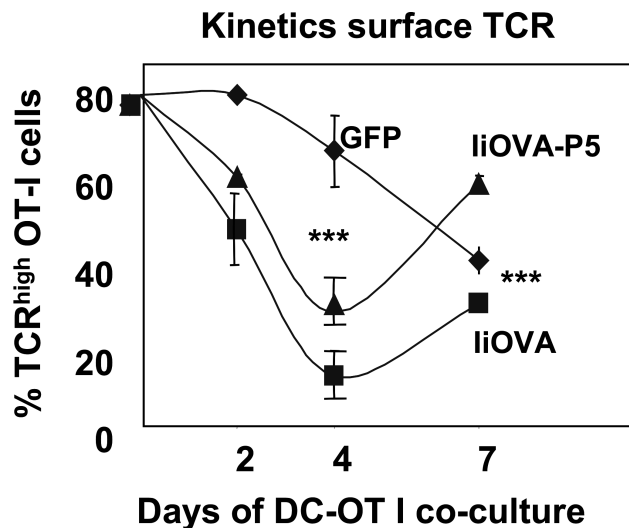

**Supplementary Figure 2. Kinetics of surface TCR expression after antigen-presentation.** OVA-specific OT-I CD8 T cells were co-cultured with DCs transduced with the indicated lentivectors within the graph. The percentage of TCR<sup>high</sup> CD8 T cells as measured by surface staining of V $\beta$ 5.1.5.2 was estimated at different time points (bottom of the graph). Mean percentages together with error bars (standard deviations) were obtained from three co-cultures. OT-I cells incubated with GFP-DC gradually died during the length of the experiment due to apoptosis by lack of TCR stimulation, which is reflected as a decrease in TCR surface levels. Statistical comparisons were performed using the Kruskal-Wallis non-parametric test. \*\*\*, highly significant differences.
